# Supplementary material for: Functionalized cellulose monolith based affinity chromatography columns for efficient separation of protein molecules
Source: Royal Society of Chemistry journal article supplement (doi:10.1039/d3lp00041a), 2023-01-01
Supplement: d3lp00041a1.pdf [file d3lp00041a1.pdf]

## Supplementary Information

### **Functionalized cellulose monolith based affinity chromatography columns for efficient separation of protein molecules**

Yusuke Hinamoto,<sup>a</sup> Akihide Sugawara,<sup>a</sup> Taka-Aki Asoh,<sup>a</sup> Mahasweta Nandi<sup>b,\*</sup> and Hiroshi Uyama<sup>a,\*</sup>

<sup>a</sup>*Department of Applied Chemistry, Graduate School of Engineering, Osaka University, Suita 565-0871, Japan*

<sup>b</sup>*Integrated Science Education and Research Centre, Siksha Bhavana, Visva-Bharati, Santiniketan 731 235, India*

E-mail: mahasweta.nandi@visva-bharati.ac.in, uyama@chem.eng.osaka-u.ac.jp

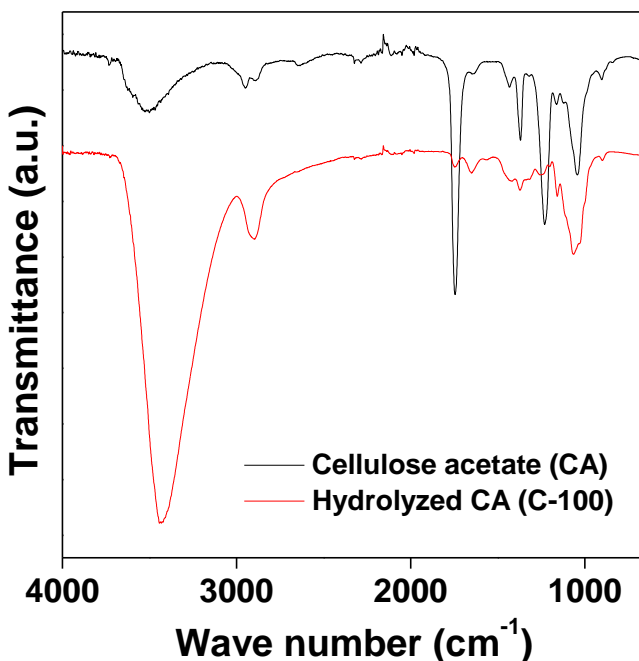

**Figure S1.** The FT-IR spectra of cellulose acetate (CA) and hydrolyzed CA for C-100.

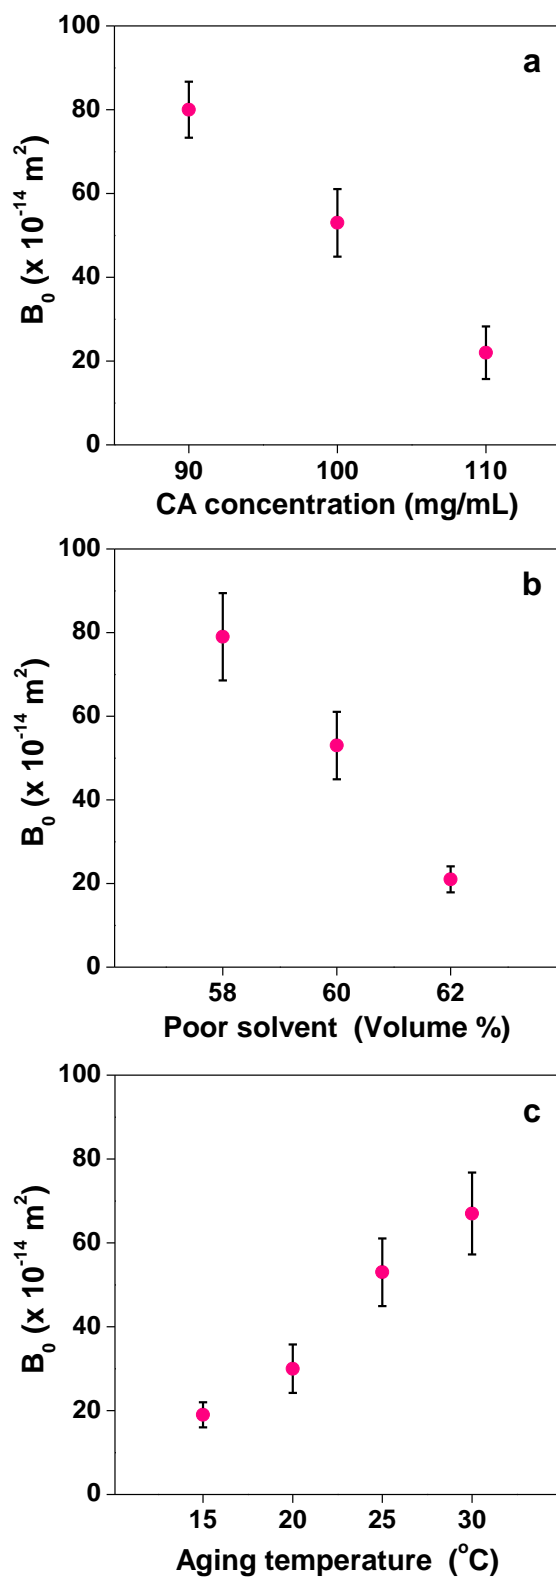

**Figure S2.** Effects of CA fabrication conditions on permeability with different fabrication condition: (a) CA concentration, (b) poor solvent ratio, (c) aging temperature. Bars represent standard error (n = 9).

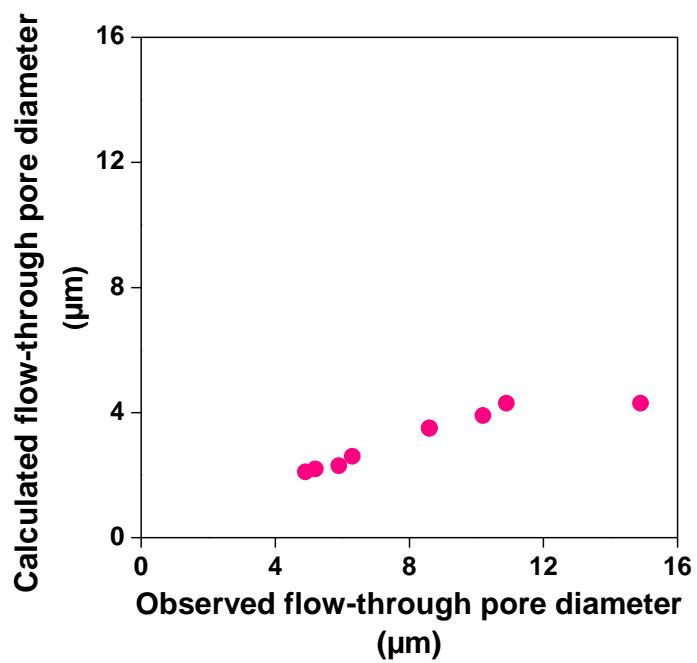

**Figure S3.** Result of the relationship between flow-through pore diameter observed by SEM and that calculated by Kozeny-Carman equation.
